# Supplementary material
Source: PubMed Central journal article supplement (PMC3406140)
Supplement: AEM.00374-12_zam999103498so1.pdf [file AEM.00374-12_zam999103498so1.pdf]

|                     | <b>mmol O<sub>2</sub>/l•h</b> |                |
|---------------------|-------------------------------|----------------|
|                     | <b>300 rpm</b>                | <b>500 rpm</b> |
| 21% O <sub>2</sub>  | 5.74 ± 1.36                   | 13.56 ± 2.33   |
| 2.1% O <sub>2</sub> | 0.52 ± 0.06                   | 1.48 ± 0.25    |

Table S1. Oxygen transfer rates at 0.25 vvm, 30°C
