# Supplementary material
Source: PubMed Central journal article supplement (PMC3406140)
Supplement: AEM.00374-12_zam999103498so2.pdf [file AEM.00374-12_zam999103498so2.pdf]

Cofermentation of glucose, xylose, and cellobiose

Table S2. Comparison of fermentation kinetics for engineered *Saccharomyces cerevisiae* and native *Spathaspora passalidarum*

| Species and strain                   | Strain background or genetic modification                                                                            | Cultivation conditions                             | Medium                                                 | Carbon source              | EtOH (g/l)        | EtOH yield (g/g) | Overall EtOH productivity (g/l·h) | Reference                                             |
|--------------------------------------|----------------------------------------------------------------------------------------------------------------------|----------------------------------------------------|--------------------------------------------------------|----------------------------|-------------------|------------------|-----------------------------------|-------------------------------------------------------|
| <i>S. cerevisiae</i> BP10001         | <i>XYL1</i> with K274R-N276D double mutant                                                                           | Bioreactor, 200 rpm, pH 5, N <sub>2</sub> -sparged | Defined minimal medium based on Jeppsson (2006)        | 5% Xylose                  | 12.4 <sup>a</sup> | 0.37             | 0.003                             | Krahulec et al. (2010); Petschacher & Nidetzky (2008) |
| <i>S. cerevisiae</i> OC2-ABGL4Xyl2   | Linear integrated 4 copies of BGL genes and 2 copies of xylose-assimilating gene                                     | Shake flask                                        | YPCX medium containing 1% yeast extract and 2% peptone | 9% Cellobiose+ 6% Xylose   | 57.4              | 0.39             | 1.196                             | Saitoh et al. (2010)                                  |
| <i>S. cerevisiae</i> DA24-16BT3      | Mutated <i>XYL1</i> preferring NADH (R276H), integrated <i>cdt1</i> with multi-copy plasmids containing <i>ghl-1</i> | Bioreactor, oxygen limited, 200 rpm                | YP medium containing 1% yeast extract and 2% peptone   | 4% Xylose                  | 12 <sup>a</sup>   | 0.31             | 0.263                             | Ha et al. (2011)                                      |
|                                      |                                                                                                                      |                                                    |                                                        | 4% Cellobiose              | 12 <sup>a</sup>   | 0.29             | 0.262                             |                                                       |
|                                      |                                                                                                                      |                                                    |                                                        | 10% Cellobiose + 6% xylose | 60 <sup>a</sup>   | 0.38             | 0.99                              |                                                       |
| <i>S. arborariae</i> UFMG-HM19.1A    | WT                                                                                                                   | Shaken flasks, 10 g/l pre-grown cells              | YP medium containing 1% yeast extract and 2% peptone   | 2% Glucose                 | 10.5              | 0.35             | 5.250                             | Cadete RM et al. (2009)                               |
|                                      |                                                                                                                      |                                                    |                                                        | 2% Xylose                  | 10                | 0.37             | 2.500                             |                                                       |
| <i>S. passalidarum</i> ATCC MYA-4345 | WT                                                                                                                   | Sealed vials                                       | YP medium containing 1% yeast extract and 2% peptone   | 3% Glucose                 | 13.5              | 0.43             | 0.188                             | Hou (2011)                                            |
|                                      |                                                                                                                      |                                                    |                                                        | 3% Xylose                  | 13.75             | 0.44             | 0.191                             |                                                       |
| <i>S. passalidarum</i> NN245         | WT                                                                                                                   | Bioreactor, low aeration                           | Defined minimal medium                                 | 10% Glucose                | 31.41             | 0.31             | 0.628                             | This study                                            |
|                                      |                                                                                                                      |                                                    |                                                        | 10% Xylose                 | 37.37             | 0.41             | 0.890                             |                                                       |
|                                      |                                                                                                                      |                                                    |                                                        | 6% Cellobiose + 4% Xylose  | 37                | 0.35             | 0.528                             |                                                       |
